# Supplementary material for: Seroprevalence of Anti-Chikungunya Virus Antibodies in Children and Adults in Managua, Nicaragua, After the First Chikungunya Epidemic, 2014-2015
Source: PubMed Central journal article supplement (PMC4913910; doi:10.1371/journal.pntd.0004773), 2016-06-20
Supplement: pntd.0004773.s002.pdf [file pntd.0004773.s002.pdf]

**Table S1. Knowledge and practices about chikungunya in the  $\geq 15$  years study population**

|                                                                  | N (%)      | Seroprevalence (95%CI) |
|------------------------------------------------------------------|------------|------------------------|
| <b>Considers him/herself informed about chikungunya</b>          |            |                        |
| <i>Yes</i>                                                       | 793 (93.5) | 13.2 (10.9, 15.6)      |
| <i>No</i>                                                        | 55 (6.5)   | 10.9 (2.4, 19.4)       |
| <b>Main source of information about chikungunya</b>              |            |                        |
| <i>TV</i>                                                        | 613 (77.3) |                        |
| <i>Radio</i>                                                     | 93 (11.7)  |                        |
| <i>Community health workers</i>                                  | 45 (5.7)   |                        |
| <i>Talks at health center/post</i>                               | 23 (2.9)   |                        |
| <i>Newspapers</i>                                                | 16 (2.0)   |                        |
| <i>Other</i>                                                     | 3 (0.4)    |                        |
| <b>Correctly identifies mosquitoes as vector of transmission</b> |            |                        |
| <i>Yes</i>                                                       | 766 (90.3) | 13.6 (11.2, 16.2)      |
| <i>No</i>                                                        | 82 (9.7)   | 8.5 (3.5, 16.8)        |
| <b>Implements at least one measure of chikungunya control</b>    |            |                        |
| <i>Yes</i>                                                       | 758 (95.4) | 13.3 (10.9, 15.9)      |
| <i>No</i>                                                        | 90 (10.6)  | 11.1 (5.5, 19.5)       |
| <b>Practices of chikungunya prevention*</b>                      |            |                        |
| <i>Elimination of mosquito breeding sites</i>                    | 620 (73.1) |                        |
| <i>Covering water containers</i>                                 | 482 (56.8) |                        |
| <i>Mosquito nets</i>                                             | 411 (48.5) |                        |
| <i>Repellent</i>                                                 | 374 (44.1) |                        |
| <i>Cleaning water containers</i>                                 | 325 (38.3) |                        |
| <i>Window screens</i>                                            | 159 (18.8) |                        |

\* Multiple choices possible.
